# Supplementary material for: Cell landscape atlas for patients with chronic thromboembolic pulmonary hypertension after pulmonary endarterectomy constructed using single-cell RNA sequencing
Source: publisher site journal article supplement (doi:10.18632/aging.203168), 2021-06-21
Supplement: Supplementary file [file aging-v13i12-203168-supplementary-material-SD1.pdf]

## SUPPLEMENTARY FIGURE

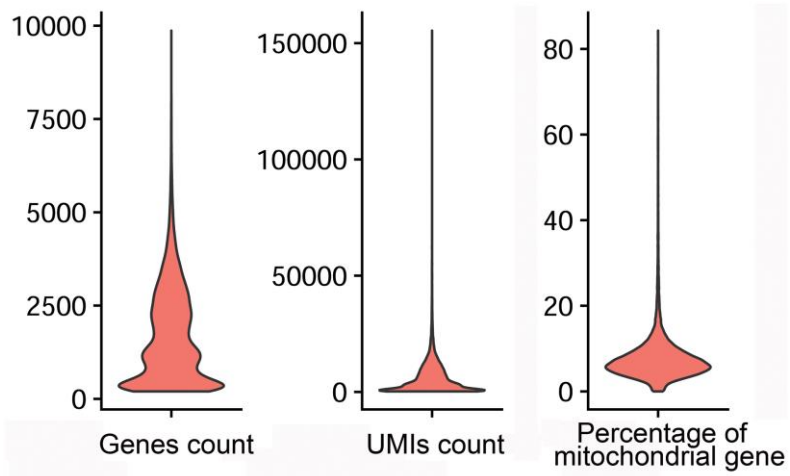

**Supplementary Figure 1. Distribution of the number of genes (left), UMI counts (middle), and percentage of mitochondrial genes (right) in cells. UMI: unique molecular identifier.**
